# Supplementary material
Source: ML conference proceedings conference paper supplement (https://openreview.net/forum?id=6eszgK9CYGP)

FLARETs\_0006

FLARETs\_0021

FLARETs\_0047

FLARETs\_0048

Ground truth

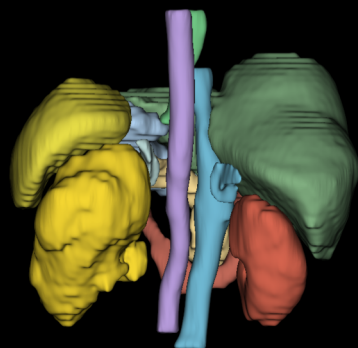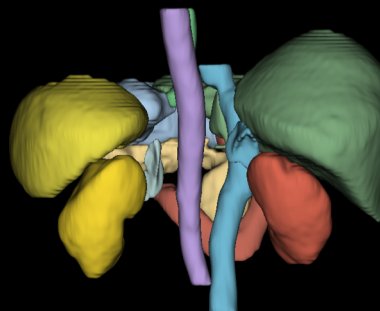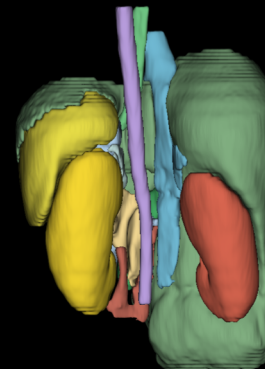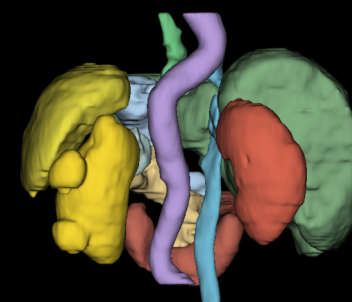

Prediction

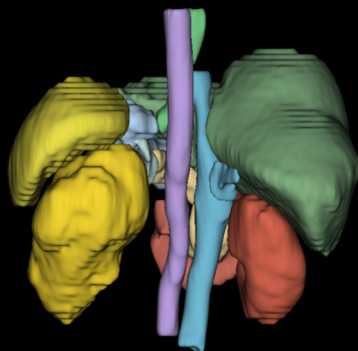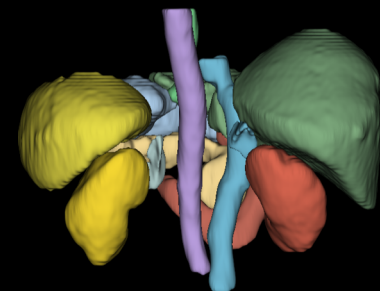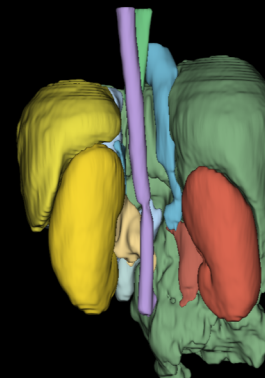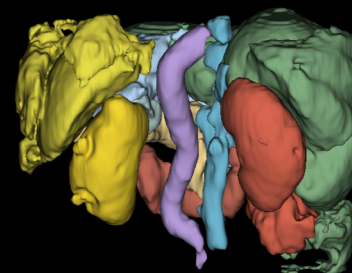

Supplement: supplementary_material [file attachment]

➡ Conv Block

➡ AnisotropicConv Block

➡ Context Block

⏚ Downsample 2x2x2

⏚ Upsample 2x2x2

→ Skip connection

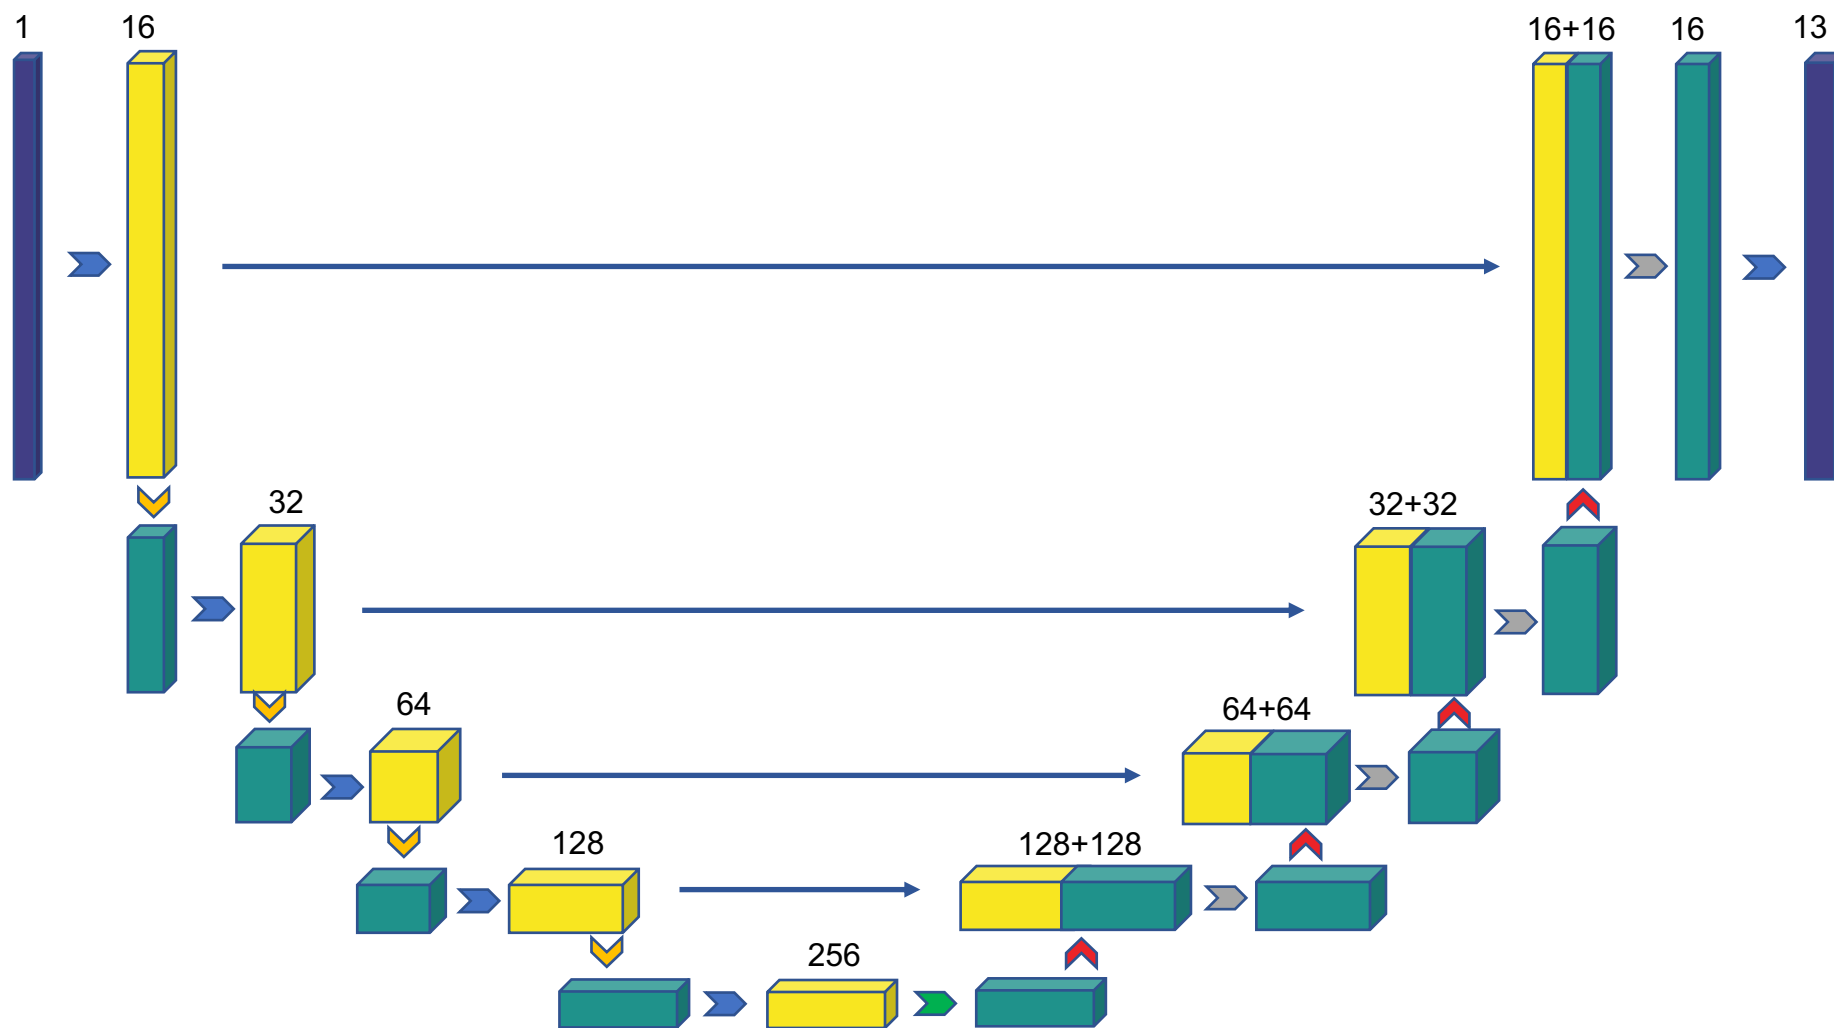

Supplement: supplementary_material [file attachment]

➡ Conv 3x3x3

➡ Conv 1x1x1

→ Skip connection

⬇ Downsample 2x2x2

⬆ Upsample 2x2x2

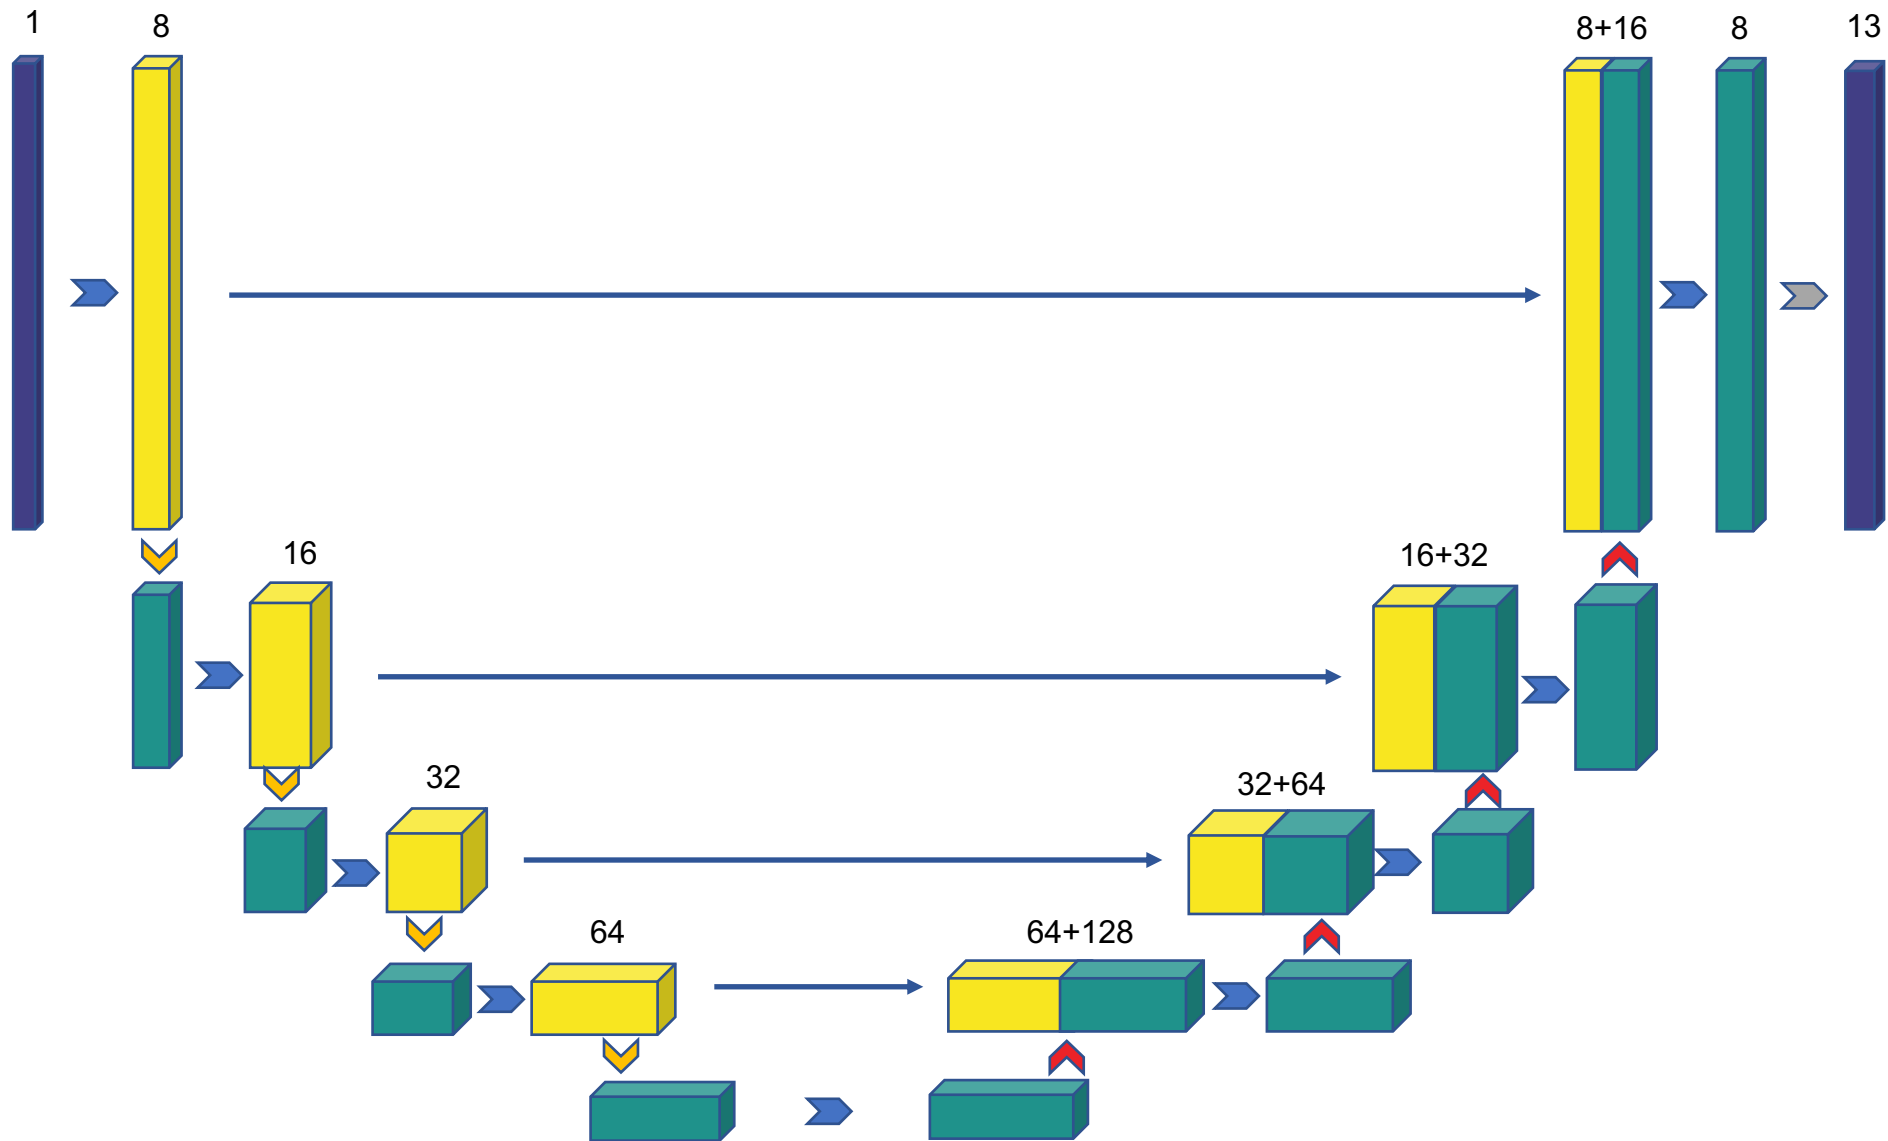

Supplement: supplementary_material [file attachment]

FLARETs\_0006

FLARETs\_0021

FLARETs\_0047

FLARETs\_0048

0.942

0.949

0.694

0.635

Ground truth

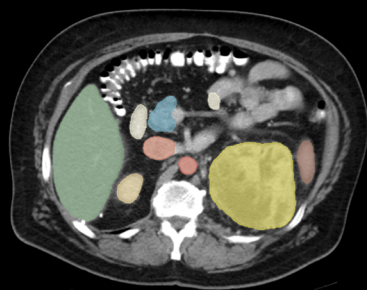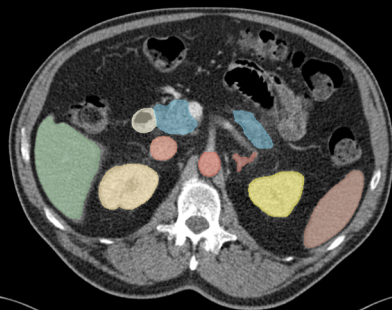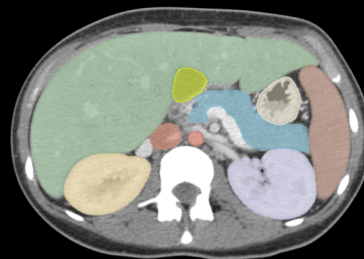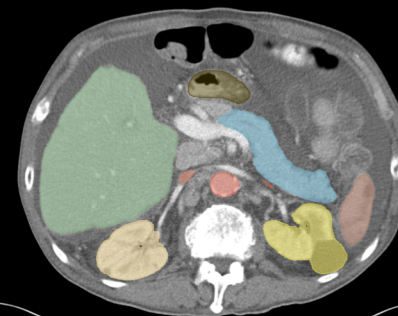

Baseline

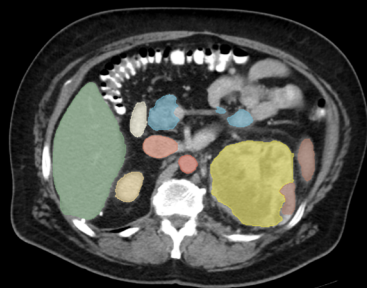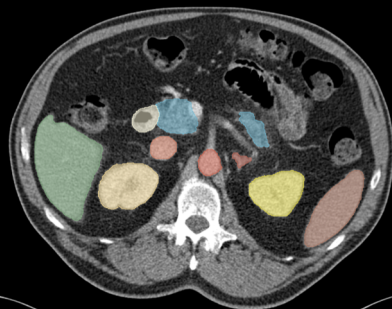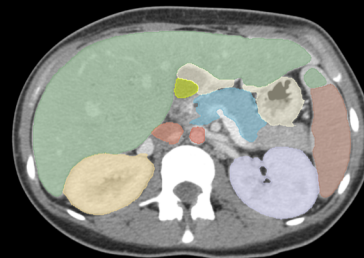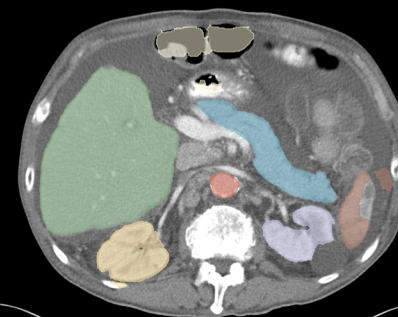

Baseline+SS

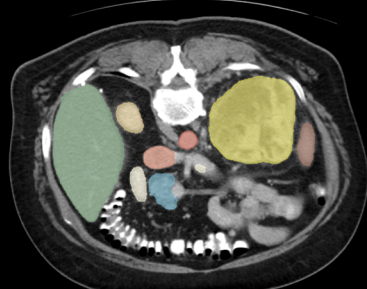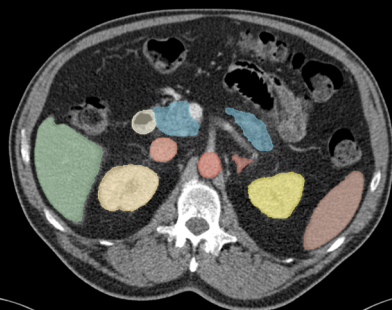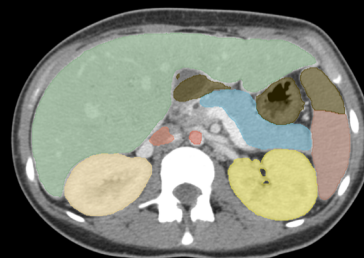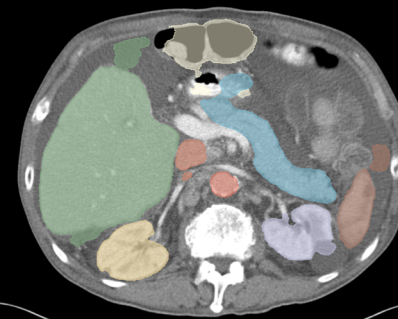

Supplement: supplementary_material [file attachment]

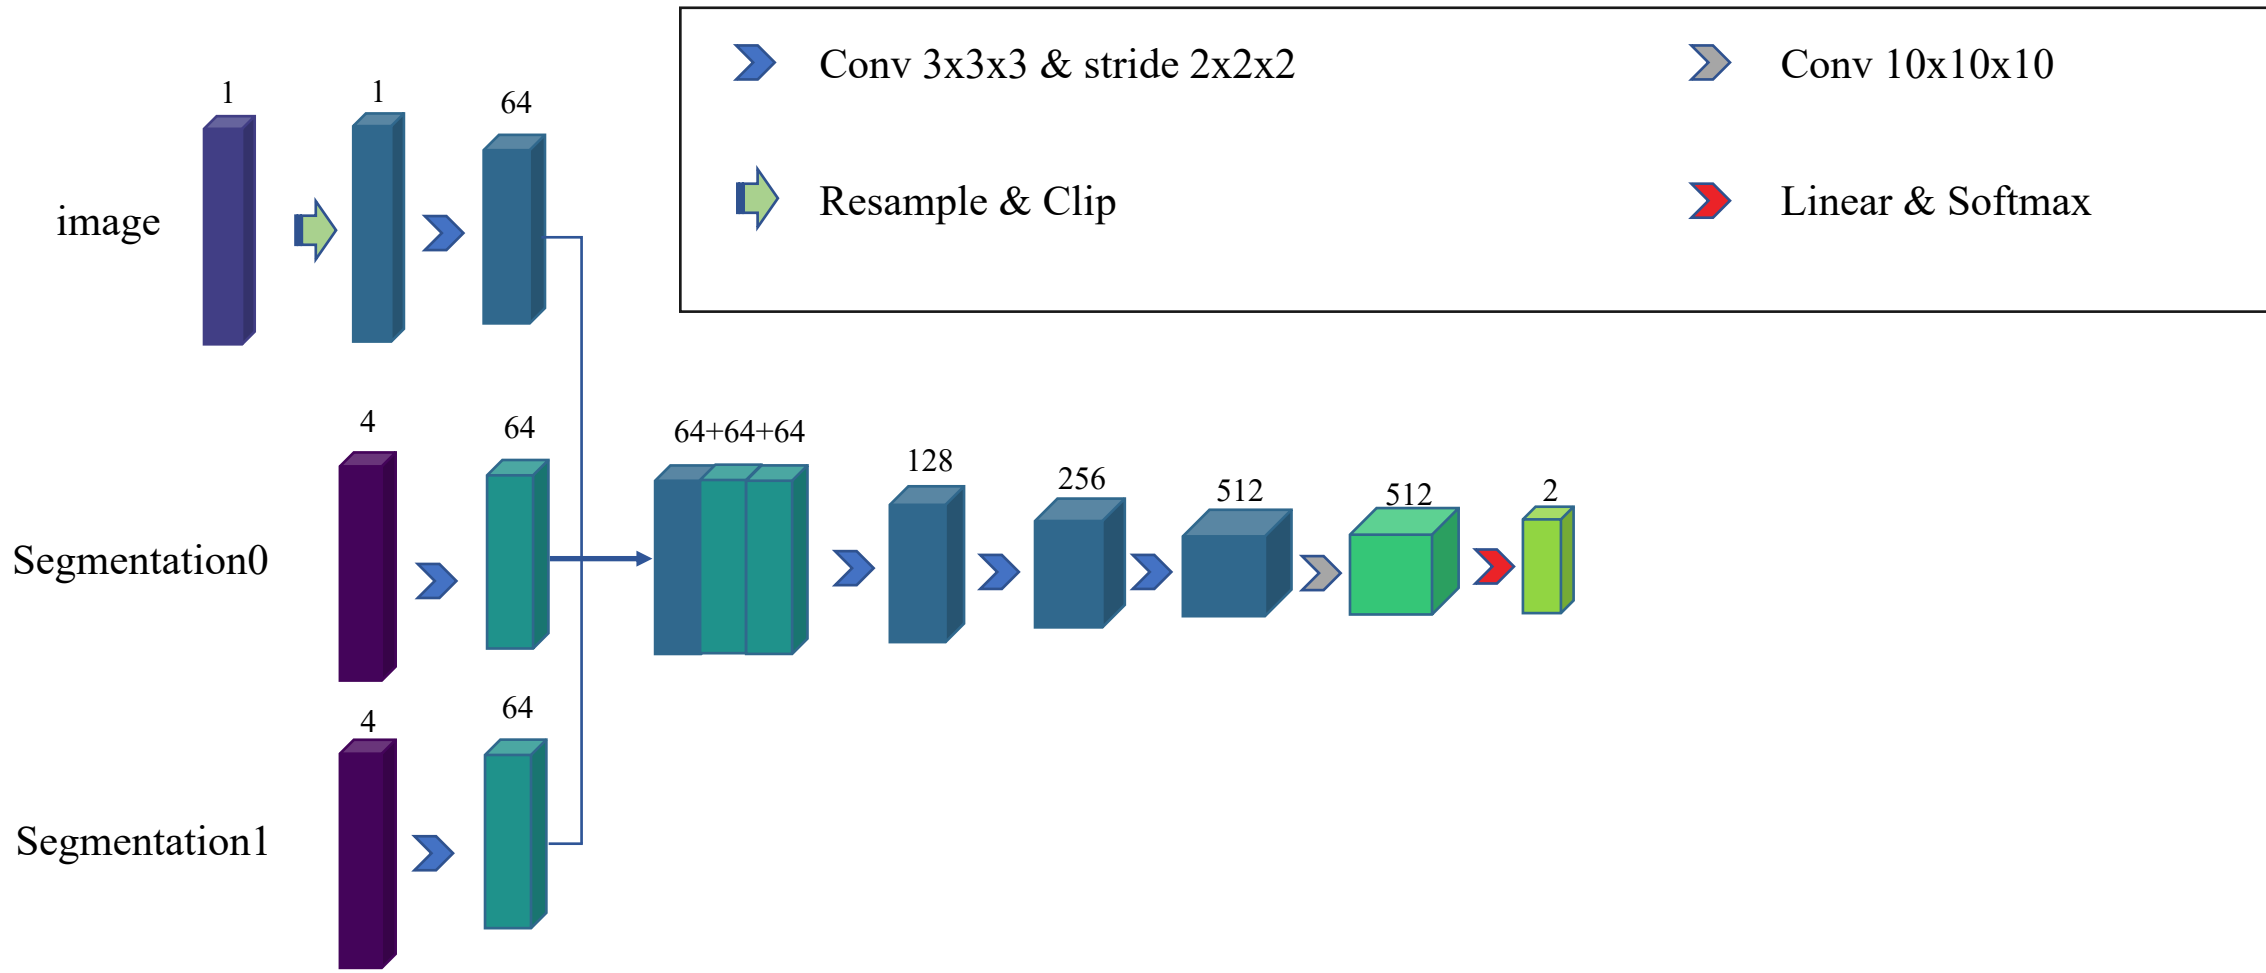

Supplement: supplementary_material [file attachment]

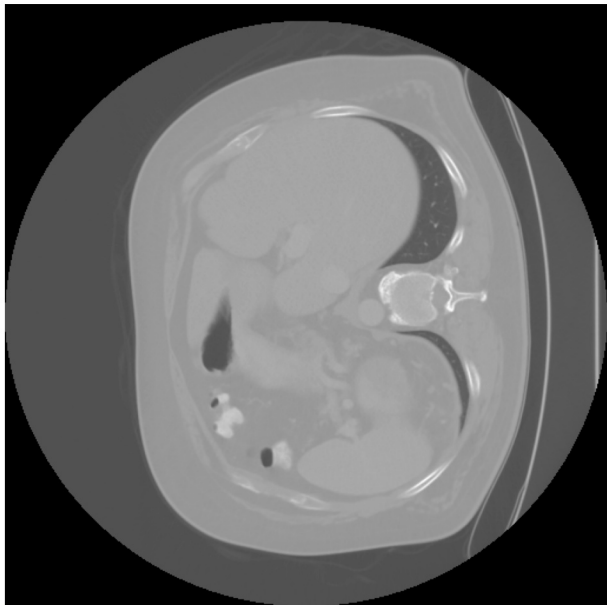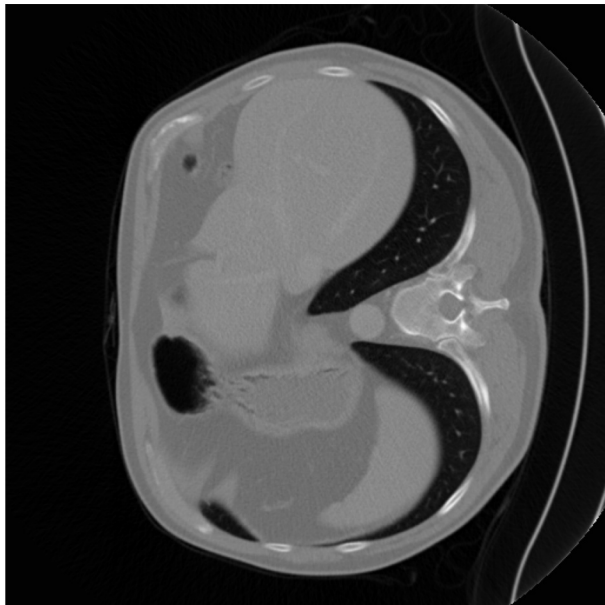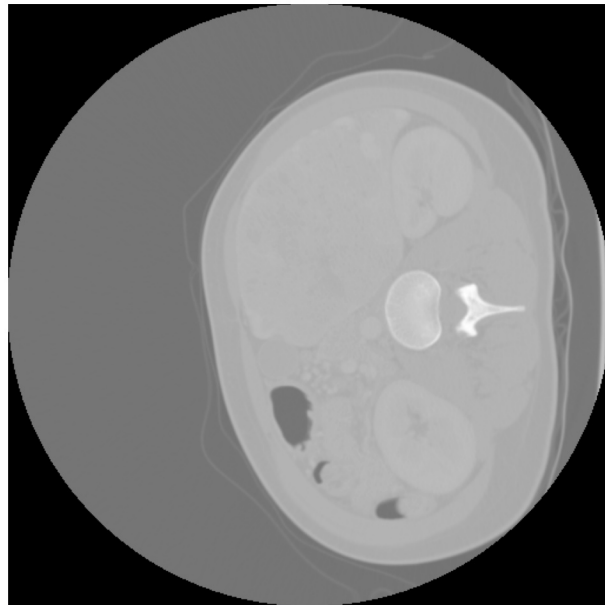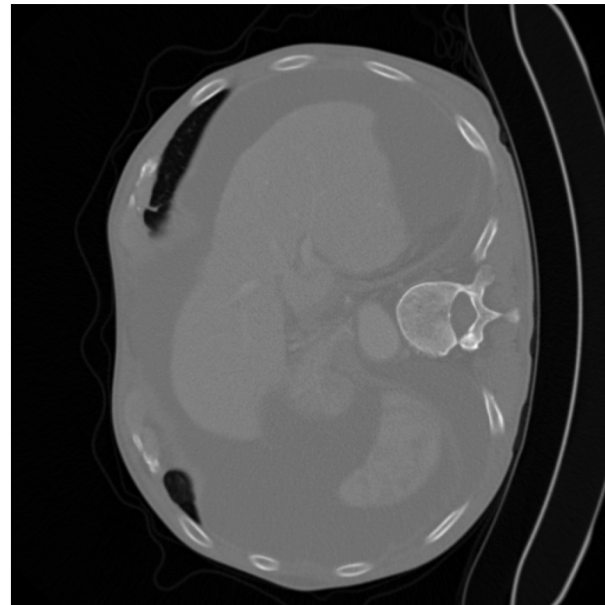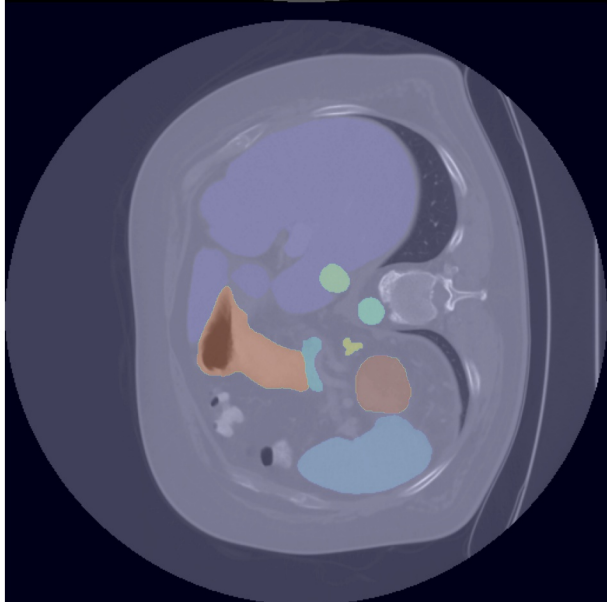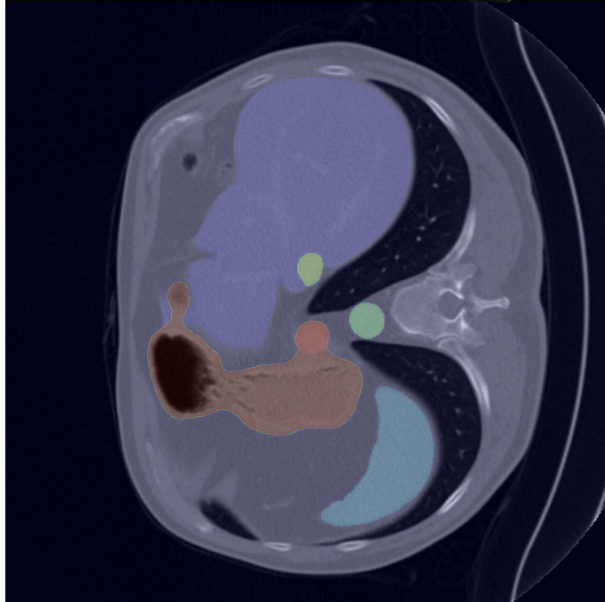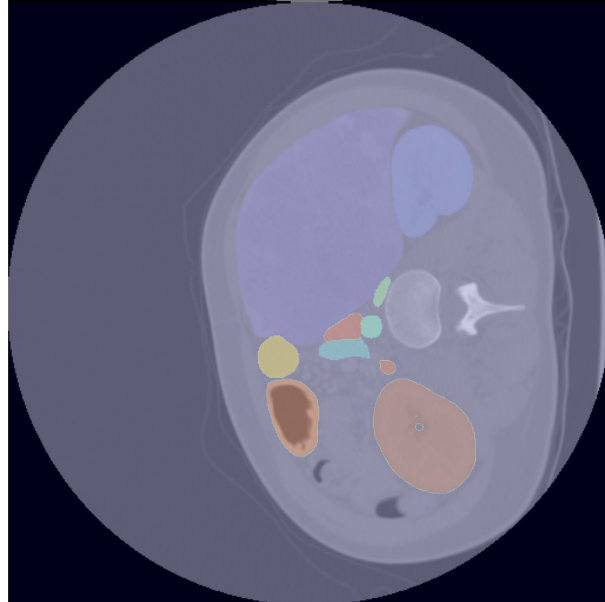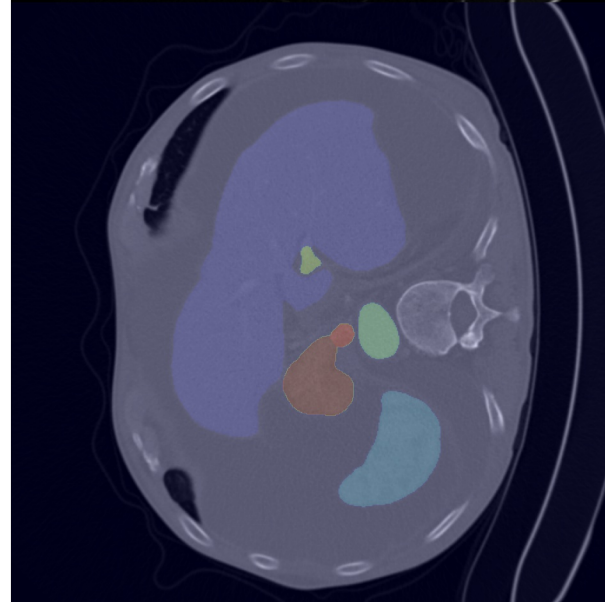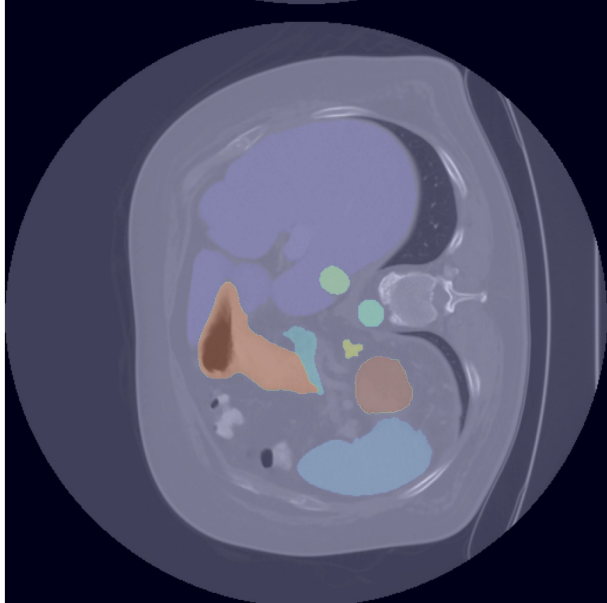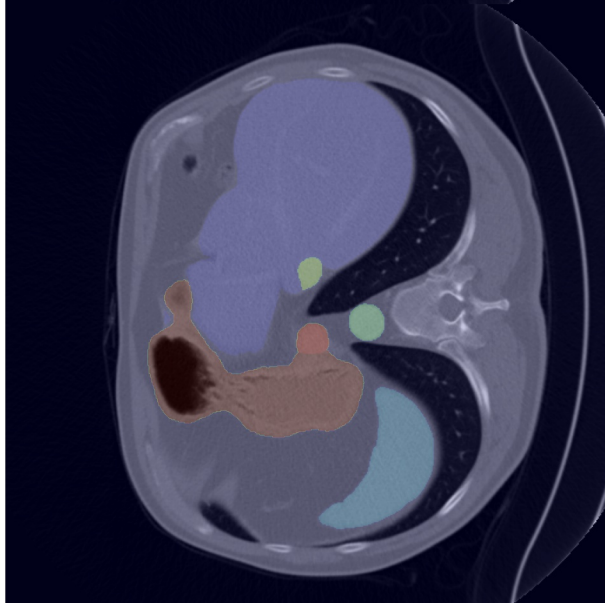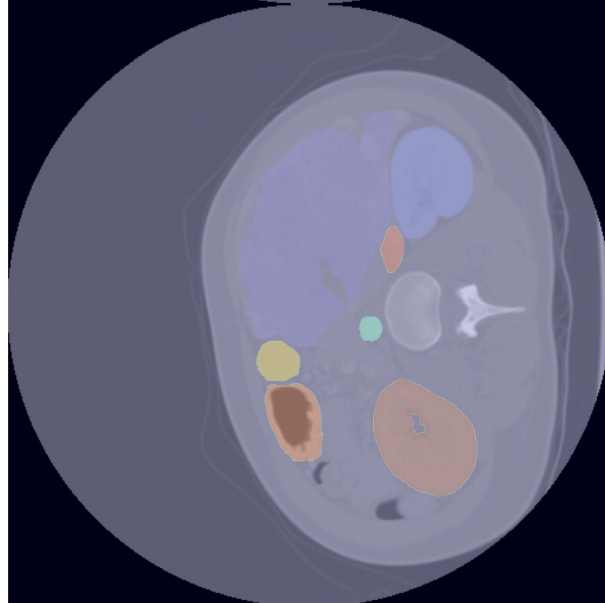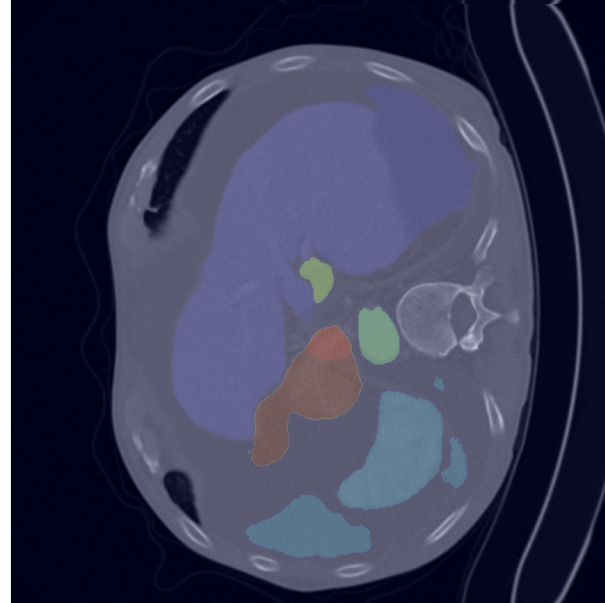

Supplement: supplementary_material [file attachment]

➡ Conv Block

➡ AnisotropicConv Block

➡ Context Block

⏚ Downsample 2x2x2

⏚ Upsample 2x2x2

➡ Skip connection

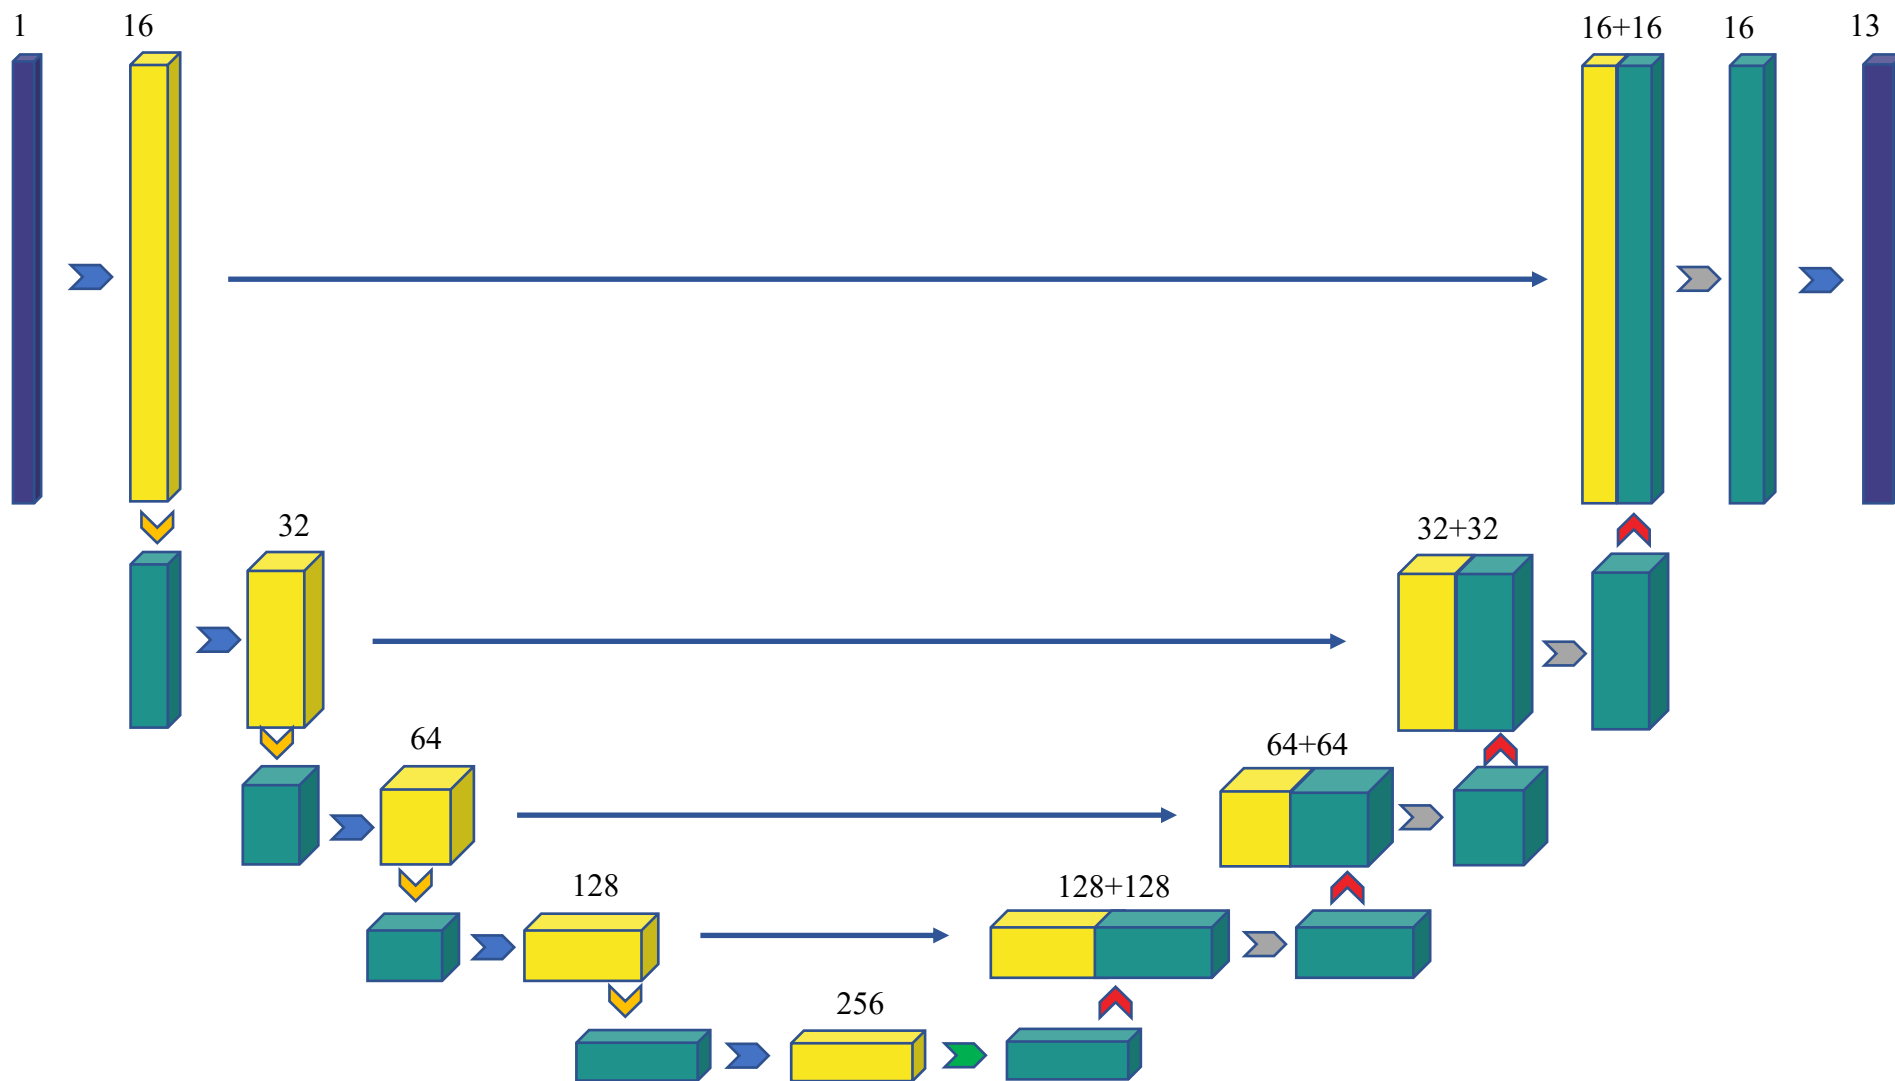

Supplement: supplementary_material [file attachment]

## Training phase

Step 1

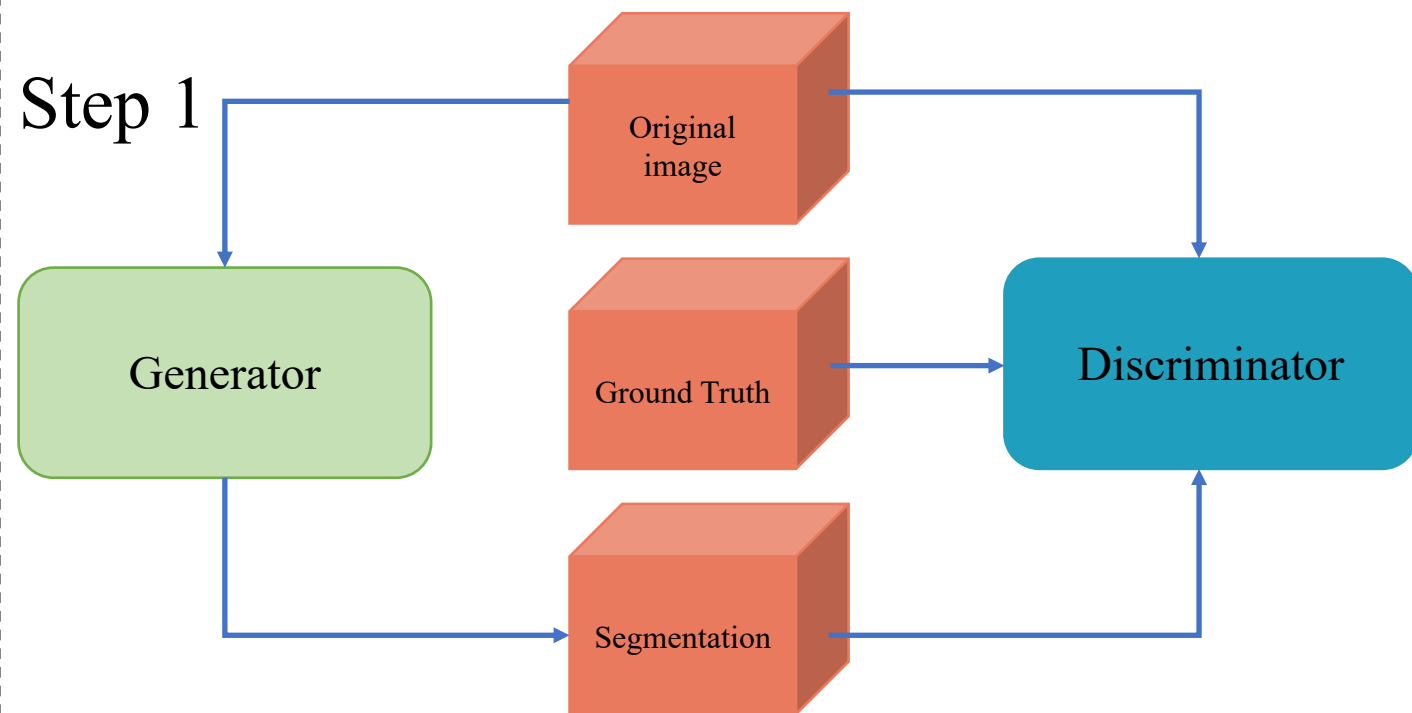

Step 2

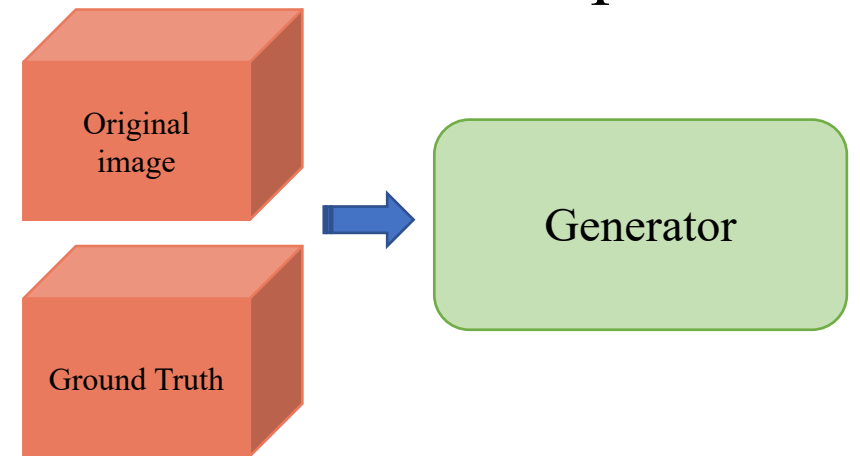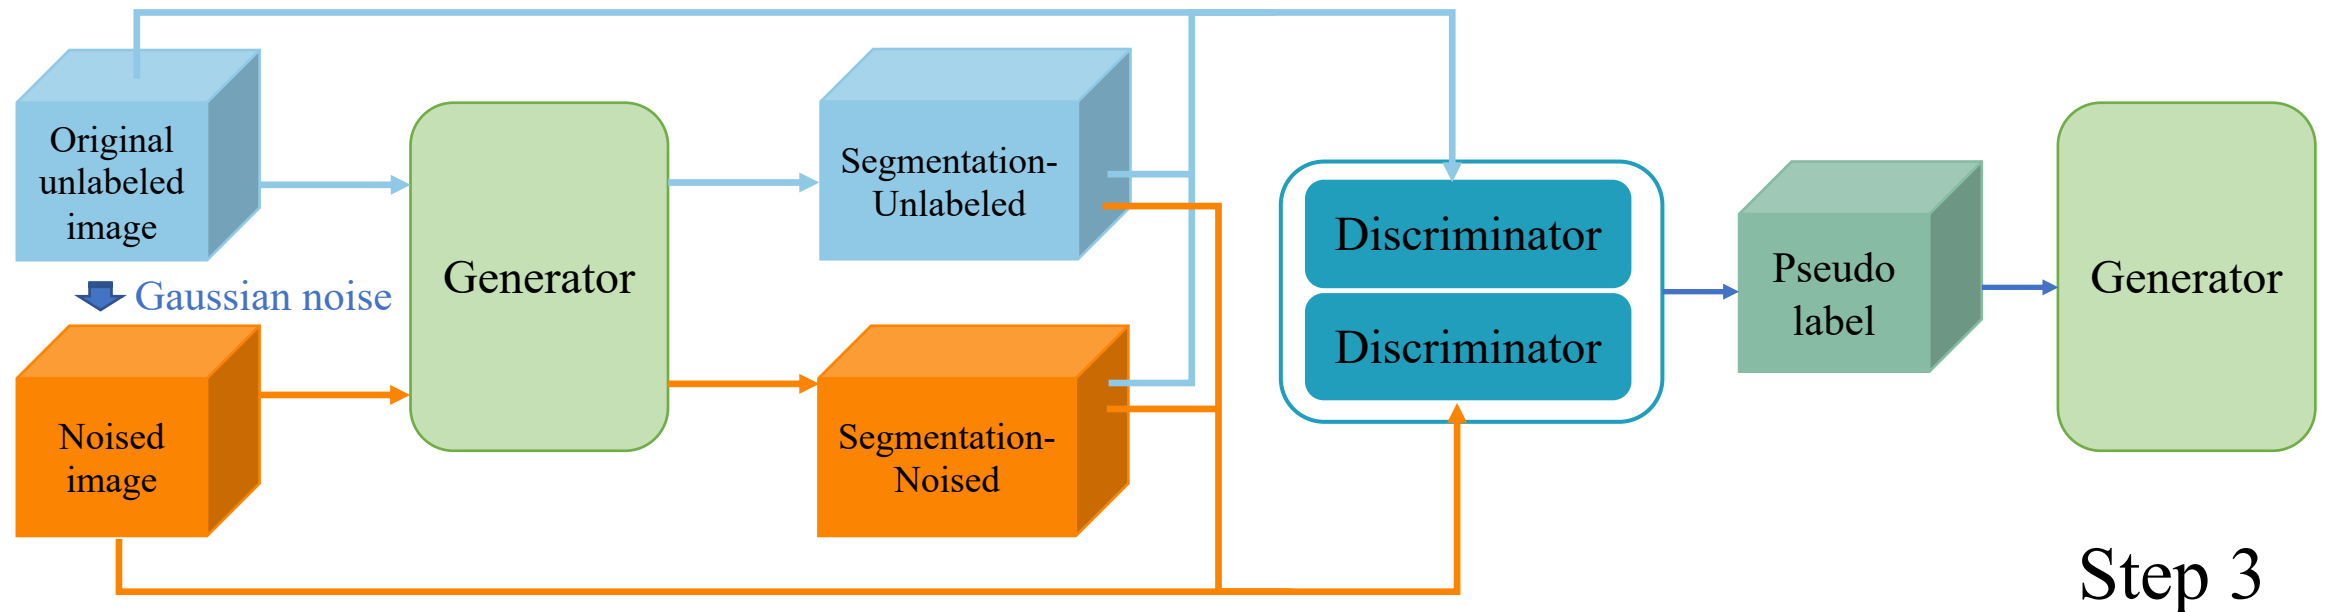

## Inference phase

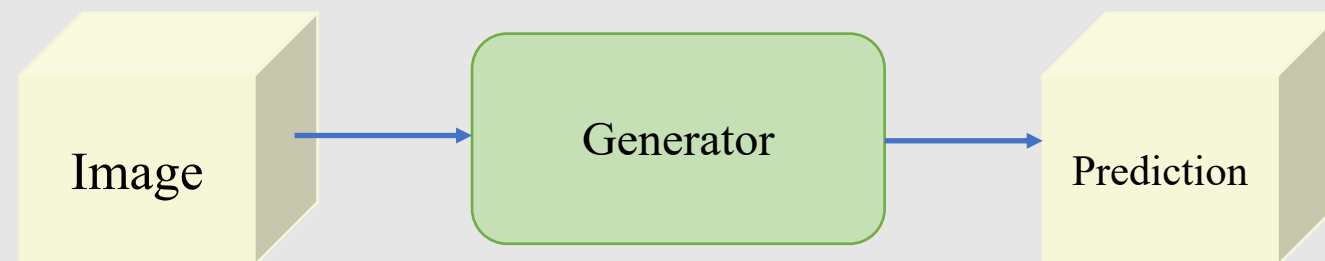

Supplement: supplementary_material [file attachment]
